# Supplementary material for: Microwave-assisted establishment of efficient amorphous polymeric phosphorescent materials with ultralong blue afterglow
Source: Royal Society of Chemistry journal article supplement (doi:10.1039/d0tc05171c), 2021-01-01
Supplement: d0tc05171c4.pdf [file d0tc05171c4.pdf]

# Supporting Information

Microwave-Assisted the Establishment of Efficient Amorphous  
Polymeric Phosphorescent Materials with Ultralong Blue Afterglow

*Yushan Zhang, Chao Liu, Hongyu Zhen, Meijuan Lin\**

\*Fujian Key Laboratory of Polymer Materials, College of Chemistry and Materials  
Science, Fujian Normal University, Fuzhou 350007, China

\*Corresponding author. Email: [mjlin@fjnu.edu.cn](mailto:mjlin@fjnu.edu.cn)

---

# Table of Contents

|                                                                                           |           |
|-------------------------------------------------------------------------------------------|-----------|
| <b>Section S1. Structure Characterization .....</b>                                       | <b>1</b>  |
| <b>Section S2. Specific Dosage of Copolymerization .....</b>                              | <b>9</b>  |
| <b>Section S3. Viscosity-average Molecular Weight of PAMs Detected .....</b>              | <b>10</b> |
| <b>Section S4. Phosphorescence lifetime and decay parameters .....</b>                    | <b>16</b> |
| <b>Section S5. Relationship of Molecular Weight and Luminescence .....</b>                | <b>21</b> |
| <b>Section S6. Transient Decay Curves of PAM in Slow Precipitation Rate .....</b>         | <b>28</b> |
| <b>Section S7. Transient Decay Curves of PAM in Other Methods .....</b>                   | <b>29</b> |
| <b>Section S8. Synthetic Method and Structure of PAM and Copolymers .....</b>             | <b>30</b> |
| <b>Section S9. Photophysical Properties of Copolymers at Different Molar Ratios .....</b> | <b>31</b> |
| <b>Section S10. Schematic Illustration of Copolymer .....</b>                             | <b>32</b> |

## Section S1. Structure Characterization

### 1. NMR

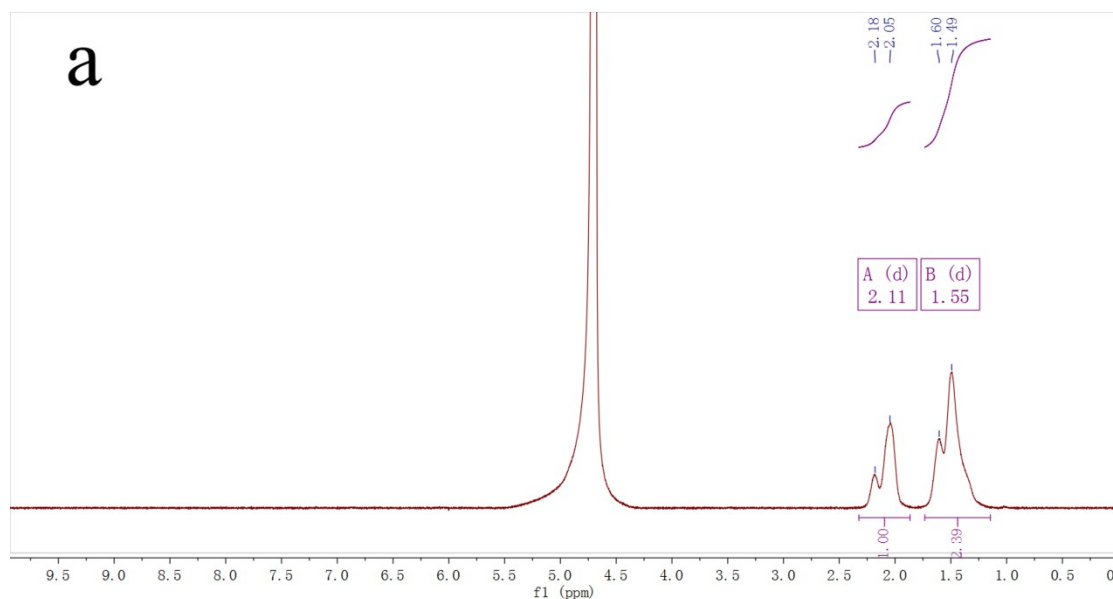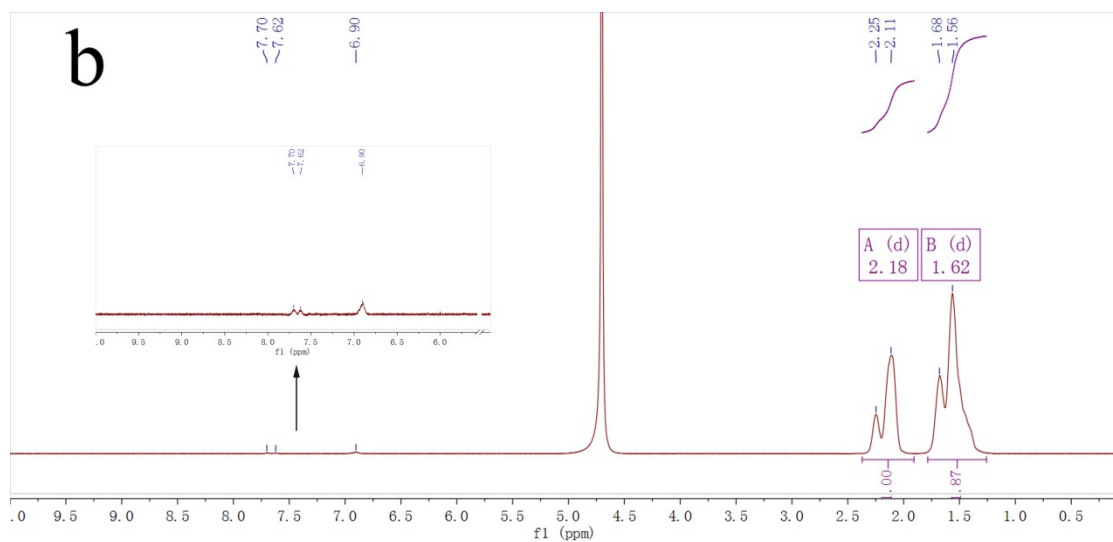

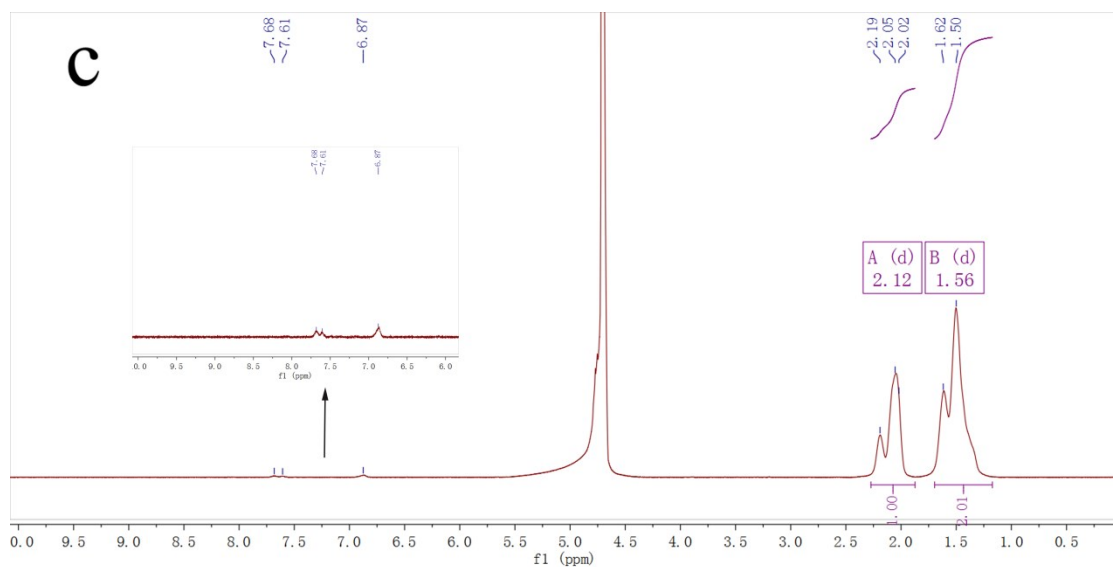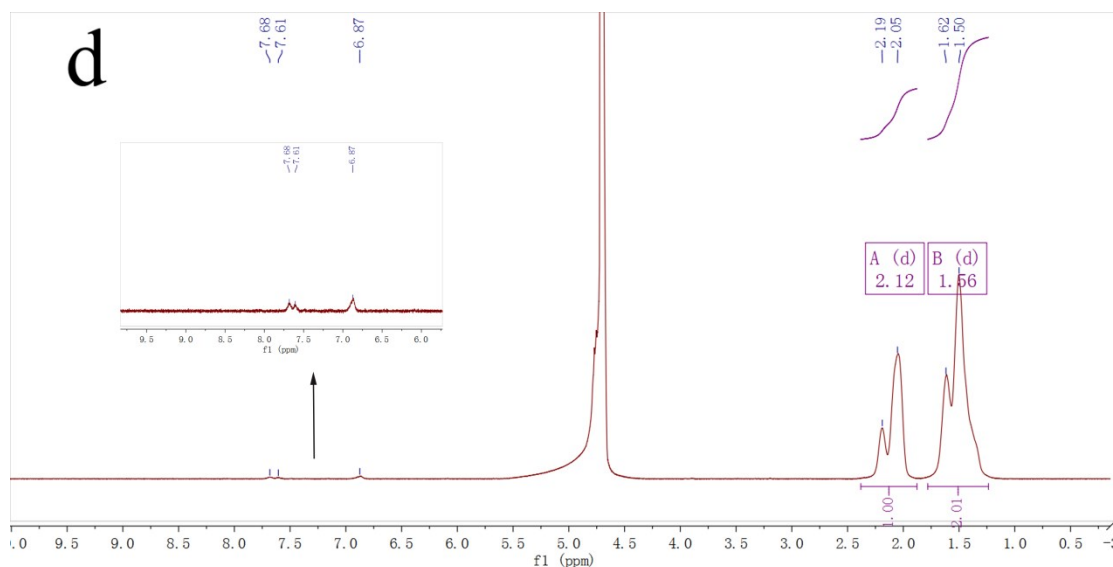

**Figure S1.**  $^1\text{H}$  NMR of PAM and copolymers obtained. (a, b, c, d) respectively present the  $^1\text{H}$  NMR of PAM and copolymers of molar ratio (1:25, 1:50, 1:75) in  $\text{D}_2\text{O}$ .

---

## 2. FT-IR

Fourier Transform Infrared Spectroscopy (FT-IR) was carried out to furtherly enhances the proof of copolymerization. Acrylamide and PAM showed in (**Figure S2c**), the characteristic sharp peaks of acrylamide appearing at  $3338\text{ cm}^{-1}$ ,  $1668\text{ cm}^{-1}$ ,  $1616\text{ cm}^{-1}$  respectively represent the N-H stretching vibration absorption peak associated by hydrogen bonding, the stretching vibration peak of C=O coming from carbonyl and N-H deformation vibration belonging to acrylamide. And the strong characteristic peaks of vinyl carbazole at  $3017\text{ cm}^{-1}$ ,  $1479\text{ cm}^{-1}$  (**Figure S2b**) originating from the C-H stretch vibration peak of benzene ring and C=C absorption peak of skeletal vibration of benzene ring in carbazole groups. The copolymers of all molar ratios exhibiting the same characteristic peaks as acrylamide and vinyl carbazole showing close to  $3380\text{ cm}^{-1}$ ,  $3190\text{ cm}^{-1}$ , while since the great disparate amount between vinyl carbazole and acrylamide participating in the polymerization, except the binary polymer at the molar ratio of 1:12.5, the rest molar ratios copolymers displayed obviously wider peaks at  $1616\text{ cm}^{-1}$  which was contributed to the overlap effect between the deformation vibration of N-H skeletal vibration of benzene ring at  $1594\text{ cm}^{-1}$  coming from carbazole groups

and the N-H deformation vibration peak at  $1616\text{ cm}^{-1}$  coming from amide groups of AM which indicated the copolymerization happened between acrylamide and vinyl carbazole.

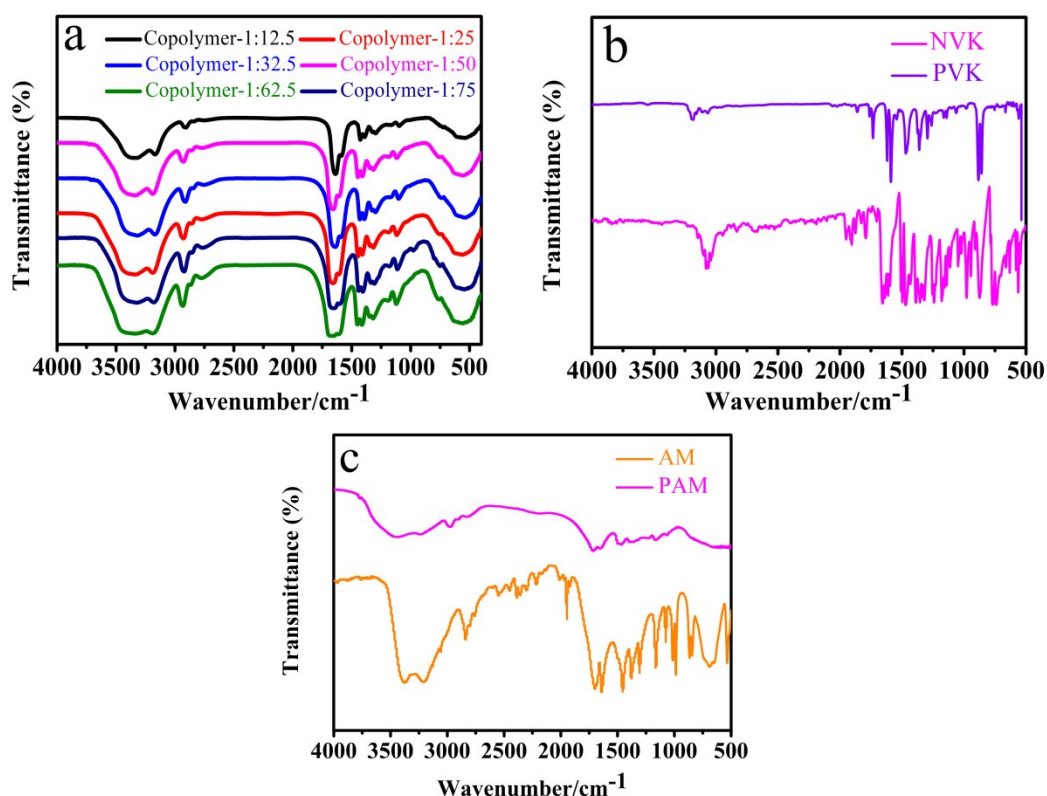

**Figure S2.** FT-IR spectra of monomers and copolymers showed molar ratio from 1:12.5 to 1:75. (a) FT-IR of copolymers at the molar ratios from 1:12.5 to 1:75; (b) Vinyl carbazole and poly(vinyl carbazole); (c) Acrylamide and poly(acrylamide).

---

## Section S2. Specific Dosage of Copolymerization

Copolymers of different molar ratios fit in different participation dosage of monomers, initiator and deionized water. Specific amount were displayed in **Table S1**.

**Table S1.** The amount of each component in copolymerization

|                  | Monomer         |                | Initiator                                                                                   | Solvent         |
|------------------|-----------------|----------------|---------------------------------------------------------------------------------------------|-----------------|
|                  | Vinyl carbazole | Acrylamide     | (NH <sub>4</sub> ) <sub>2</sub> S <sub>2</sub> O <sub>8</sub> aqueous solution <sup>1</sup> | Deionized water |
|                  | (mg, mmol)      |                | (mL)                                                                                        | (mL)            |
| Copolymer-1:12.5 | 50, 0.26        | 229.88, 3.23   | 0.70                                                                                        | 5.0             |
| Copolymer-1:25   | 50, 0.26        | 459.77, 6.46   | 1.27                                                                                        | 7.5             |
| Copolymer-1:37.5 | 50, 0.26        | 689.65, 9.70   | 1.85                                                                                        | 10.0            |
| Copolymer-1:50   | 50, 0.26        | 919.53, 12.94  | 2.40                                                                                        | 15.0            |
| Copolymer-1:62.5 | 50, 0.26        | 1149.42, 16.17 | 3.00                                                                                        | 18.2            |
| Copolymer-1:75   | 50, 0.26        | 1379.30, 19.40 | 3.57                                                                                        | 20.0            |

<sup>1</sup>. (NH<sub>4</sub>)<sub>2</sub>S<sub>2</sub>O<sub>8</sub> concentration is 0.018 M.

---

### Section S3. Viscosity-average Molecular Weight of PAMs Detected

The average molecular weight of the viscosity ( $M_\eta$ ) was determined by the viscosity method with Ubbelohde Viscometer. Since the aqueous solution viscosity of polymer reflects the internal friction force during the flow, the viscosity of polymer solution can be obtained by comparing the relationship between the friction force of a pure solution and a thin solution of a polymer.

Polyacrylamide of certain concentration dissolved in water was prepared as a fixed initial concentration solution after full swelling and dissolution. Place the prepared Ubbelohde Viscometer at Smart thermostat instrument to keep the temperature sustaining at 30 °C with error range does not exceed 0.02 °C, respectively document the time pure solvents and polymer solutions leave capillaries behind for. Ensure that within the error range, measure three times and take the average finally obtained the  $t$  and  $t_0$  respectively present the record the flow of time of polymer aqueous solution and pure solvent. **Table S2-Table S8** displayed the flow time of PAMs from P10-P100, PAMs obtained from other methods at different diluted concentration. According to the relative

viscosity  $\eta_r = \frac{t}{t_0}$  and specific viscosity  $\eta_{SP} = \eta_r - 1$ , we could obtain curves of  $\frac{\eta_{SP}}{C} - C$  and  $\frac{\ln \eta_r}{C} - C$  showed in **Figure S3** then extrapolate the



---

two curves the intercept corresponding to the intersection point obtained is the intrinsic viscosity  $[\eta]$ . When the two straight lines do not

intersect on the ordinate when extrapolating, curve of  $\frac{\eta_{SP}}{C} - C$  was adopted to get the intrinsic viscosity  $[\eta]$ . Check the empirical parameters from POLYMER HANDIBOOK, average relative molecular weight  $\bar{M}$  was obtained from  $[\eta] = K[M]^\alpha$ . Respectively record the time for solution to flow through the capillary as  $t_0$ , PAMs obtained at different firepower (P10, P30, P50, P80 and P100).

**Table S2.** Flow time of PAM obtained at MWP-P10 at different diluted concentration.

| PAM-P10 initial concentration ( $g/cm^3$ ): 0.01 (210 mg/21 mL) |        |        |        |           | Constant temperature: 30 °C |             |               |                |
|-----------------------------------------------------------------|--------|--------|--------|-----------|-----------------------------|-------------|---------------|----------------|
| $c/g \cdot cm^{-3}$                                             | $t_1$  | $t_2$  | $t_3$  | $\bar{t}$ | $\eta_r$                    | $\eta_{sp}$ | $\eta_{sp}/c$ | $\ln \eta_r/c$ |
| 0.01                                                            | 227.65 | 227.91 | 227.76 | 227.77    | 2.5713                      | 1.5713      | 157.1347      | 94.4430        |
| 0.008077                                                        | 219.06 | 219.16 | 219.22 | 219.15    | 2.4740                      | 1.4740      | 182.4995      | 112.1529       |
| 0.006774                                                        | 212.08 | 212.16 | 212.21 | 212.15    | 2.3950                      | 1.3950      | 205.9301      | 128.9286       |
| 0.005122                                                        | 207.47 | 207.17 | 207.35 | 207.33    | 2.3406                      | 1.3406      | 261.7354      | 166.0316       |
| 0.003750                                                        | 201.31 | 201.61 | 201.46 | 201.46    | 2.2743                      | 1.2743      | 339.8209      | 219.1159       |

**Table S3.** Flow time of PAM obtained at MWP-P30 at different diluted concentration.

| PAM-P30 initial concentration ( $g/cm^3$ ): 0.01 (115.4 mg/11.54 mL) |        |        |        |           | Constant temperature: 30 °C |             |               |                |
|----------------------------------------------------------------------|--------|--------|--------|-----------|-----------------------------|-------------|---------------|----------------|
| $c/g \cdot cm^{-3}$                                                  | $t_1$  | $t_2$  | $t_3$  | $\bar{t}$ | $\eta_r$                    | $\eta_{sp}$ | $\eta_{sp}/c$ | $\ln \eta_r/c$ |
| 0.01                                                                 | 251.17 | 251.44 | 251.36 | 251.32    | 2.8372                      | 1.8372      | 183.7247      | 104.2834       |
| 0.006977                                                             | 249.31 | 249.26 | 249.29 | 249.29    | 2.8142                      | 1.8142      | 260.0327      | 148.3007       |
| 0.0005375                                                            | 230.27 | 230.43 | 230.25 | 230.35    | 2.6005                      | 1.6005      | 298.7367      | 178.3851       |

|           |        |        |        |        |        |        |          |          |
|-----------|--------|--------|--------|--------|--------|--------|----------|----------|
| 0.0003659 | 224.39 | 224.41 | 224.36 | 224.39 | 2.5332 | 1.5332 | 419.0263 | 254.0322 |
| 0.0002542 | 214.24 | 214.32 | 214.39 | 214.32 | 2.4195 | 1.4195 | 558.3884 | 374.5686 |

**Table S4.** Flow time of PAM obtained at MWP-P50 at different diluted concentration.

| PAM-P50 initial concentration ( $g/cm^3$ ) : 0.01 (123.2 mg/12.32 mL) Constant temperature: 30 °C |        |        |        |           |          |             |               |                |
|---------------------------------------------------------------------------------------------------|--------|--------|--------|-----------|----------|-------------|---------------|----------------|
| $c/g \cdot cm^{-3}$                                                                               | $t_1$  | $t_2$  | $t_3$  | $\bar{t}$ | $\eta_r$ | $\eta_{sp}$ | $\eta_{sp}/c$ | $\ln \eta_r/c$ |
| 0.01                                                                                              | 229.51 | 229.62 | 229.47 | 229.53    | 2.5913   | 1.5913      | 159.1255      | 95.2142        |
| 0.007113                                                                                          | 223.37 | 223.42 | 223.55 | 223.45    | 2.5225   | 2.5225      | 214.0455      | 130.0781       |
| 0.005520                                                                                          | 218.76 | 218.84 | 218.55 | 218.72    | 2.4691   | 2.4691      | 266.1629      | 163.7533       |
| 0.003812                                                                                          | 214.56 | 214.69 | 214.74 | 214.66    | 2.4234   | 2.4234      | 373.4072      | 232.2121       |
| 0.002604                                                                                          | 209.26 | 209.33 | 209.44 | 209.34    | 2.3633   | 2.3633      | 523.6408      | 330.3449       |

**Table S5.** Flow time of PAM obtained at MWP-P80 at different diluted concentration.

| PAM-P80 initial concentration ( $g/cm^3$ ) : 0.01 (119.3 mg/11.93 mL) Constant temperature: 30 °C |        |        |        |           |          |             |               |                |
|---------------------------------------------------------------------------------------------------|--------|--------|--------|-----------|----------|-------------|---------------|----------------|
| $c/g \cdot cm^{-3}$                                                                               | $t_1$  | $t_2$  | $t_3$  | $\bar{t}$ | $\eta_r$ | $\eta_{sp}$ | $\eta_{sp}/c$ | $\ln \eta_r/c$ |
| 0.01                                                                                              | 299.22 | 299.03 | 299.33 | 299.19    | 3.3777   | 2.3777      | 237.7662      | 121.7184       |
| 0.007047                                                                                          | 274.42 | 274.67 | 274.59 | 274.56    | 3.1000   | 2.1000      | 297.9525      | 160.5389       |
| 0.005440                                                                                          | 263.55 | 263.32 | 263.49 | 263.45    | 2.9742   | 1.9742      | 362.8993      | 200.3608       |
| 0.003736                                                                                          | 246.15 | 246.42 | 246.33 | 246.3     | 2.7805   | 1.7805      | 476.5512      | 273.7052       |
| 0.002542                                                                                          | 249.54 | 249.38 | 249.65 | 249.52    | 2.8169   | 1.8169      | 714.7389      | 407.4005       |

**Table S6.** Flow time of PAM obtained at MWP-P100 at different diluted concentration.

| PAM-P100 initial concentration ( $g/cm^3$ ): 0.01 (95 mg/9.5 mL) |        |        |        |           | Constant temperature: 30 °C |             |               |                |
|------------------------------------------------------------------|--------|--------|--------|-----------|-----------------------------|-------------|---------------|----------------|
| $c/g \cdot cm^{-3}$                                              | $t_1$  | $t_2$  | $t_3$  | $\bar{t}$ | $\eta_r$                    | $\eta_{sp}$ | $\eta_{sp}/c$ | $\ln \eta_r/c$ |
| 0.01                                                             | 282.56 | 282.43 | 282.49 | 282.49    | 3.1891                      | 2.1891      | 218.9132      | 115.9749       |
| 0.006552                                                         | 260.52 | 260.06 | 260.19 | 260.26    | 2.9381                      | 1.9381      | 295.8149      | 164.5006       |
| 0.004872                                                         | 244.51 | 254.34 | 254.55 | 251.13    | 2.8351                      | 1.8351      | 376.6788      | 213.9002       |
| 0.003220                                                         | 226.21 | 226.43 | 226.29 | 226.31    | 2.5549                      | 1.5549      | 482.8267      | 291.2736       |
| 0.002135                                                         | 211.66 | 211.52 | 211.52 | 211.66    | 2.3894                      | 1.3894      | 650.8433      | 408.0225       |

**Table S7.** Flow time of PAM obtained in oil bathing method at different diluted concentration.

| PAM-HT initial concentration ( $g/cm^3$ ): 0.01(210 mg/21 mL) |        |        |        |           | Constant temperature: 30 °C |             |               |                |
|---------------------------------------------------------------|--------|--------|--------|-----------|-----------------------------|-------------|---------------|----------------|
| $c/g \cdot cm^{-3}$                                           | $t_1$  | $t_2$  | $t_3$  | $\bar{t}$ | $\eta_r$                    | $\eta_{sp}$ | $\eta_{sp}/c$ | $\ln \eta_r/c$ |
| 0.01                                                          | 168.46 | 168.56 | 168.63 | 168.55    | 1.9028                      | 0.9028      | 45.1400       | 32.1663        |
| 0.008077                                                      | 156.87 | 156.64 | 156.59 | 156.70    | 1.7690                      | 0.7690      | 95.2123       | 70.6243        |
| 0.006774                                                      | 146.97 | 146.93 | 146.73 | 146.88    | 1.6581                      | 0.6581      | 97.1517       | 74.6491        |
| 0.005833                                                      | 139.24 | 139.19 | 139.07 | 139.17    | 1.5711                      | 0.5711      | 97.9002       | 77.4453        |
| 0.004117                                                      | 131.25 | 131.55 | 131.44 | 131.41    | 1.4836                      | 0.4836      | 117.4349      | 95.7930        |

**Table S8.** Flow time of PAM obtained in hydrothermal heating method at different diluted concentration.

| PAM-CT initial concentration ( $g/cm^3$ ) : 0.01(165 mg/16.5 mL) |        | Constant temperature: 30 °C |        |           |          |             |               |                |
|------------------------------------------------------------------|--------|-----------------------------|--------|-----------|----------|-------------|---------------|----------------|
| $c/g \cdot cm^{-3}$                                              | $t_1$  | $t_2$                       | $t_3$  | $\bar{t}$ | $\eta_r$ | $\eta_{sp}$ | $\eta_{sp}/c$ | $\ln \eta_r/c$ |
| 0.01                                                             | 222.49 | 222.54                      | 222.37 | 222.47    | 2.5115   | 1.5115      | 151.1477      | 92.0871        |
| 0.007674                                                         | 210.58 | 210.59                      | 210.73 | 210.63    | 2.3779   | 1.3779      | 179.5430      | 112.8701       |
| 0.006226                                                         | 198.54 | 198.63                      | 198.43 | 198.53    | 2.2413   | 1.2413      | 199.3584      | 129.6173       |
| 0.004520                                                         | 193.56 | 193.29                      | 193.46 | 193.44    | 2.1838   | 1.1838      | 261.8601      | 172.7764       |
| 0.003204                                                         | 189.26 | 189.54                      | 189.63 | 189.48    | 2.1390   | 1.1390      | 355.5203      | 237.3244       |

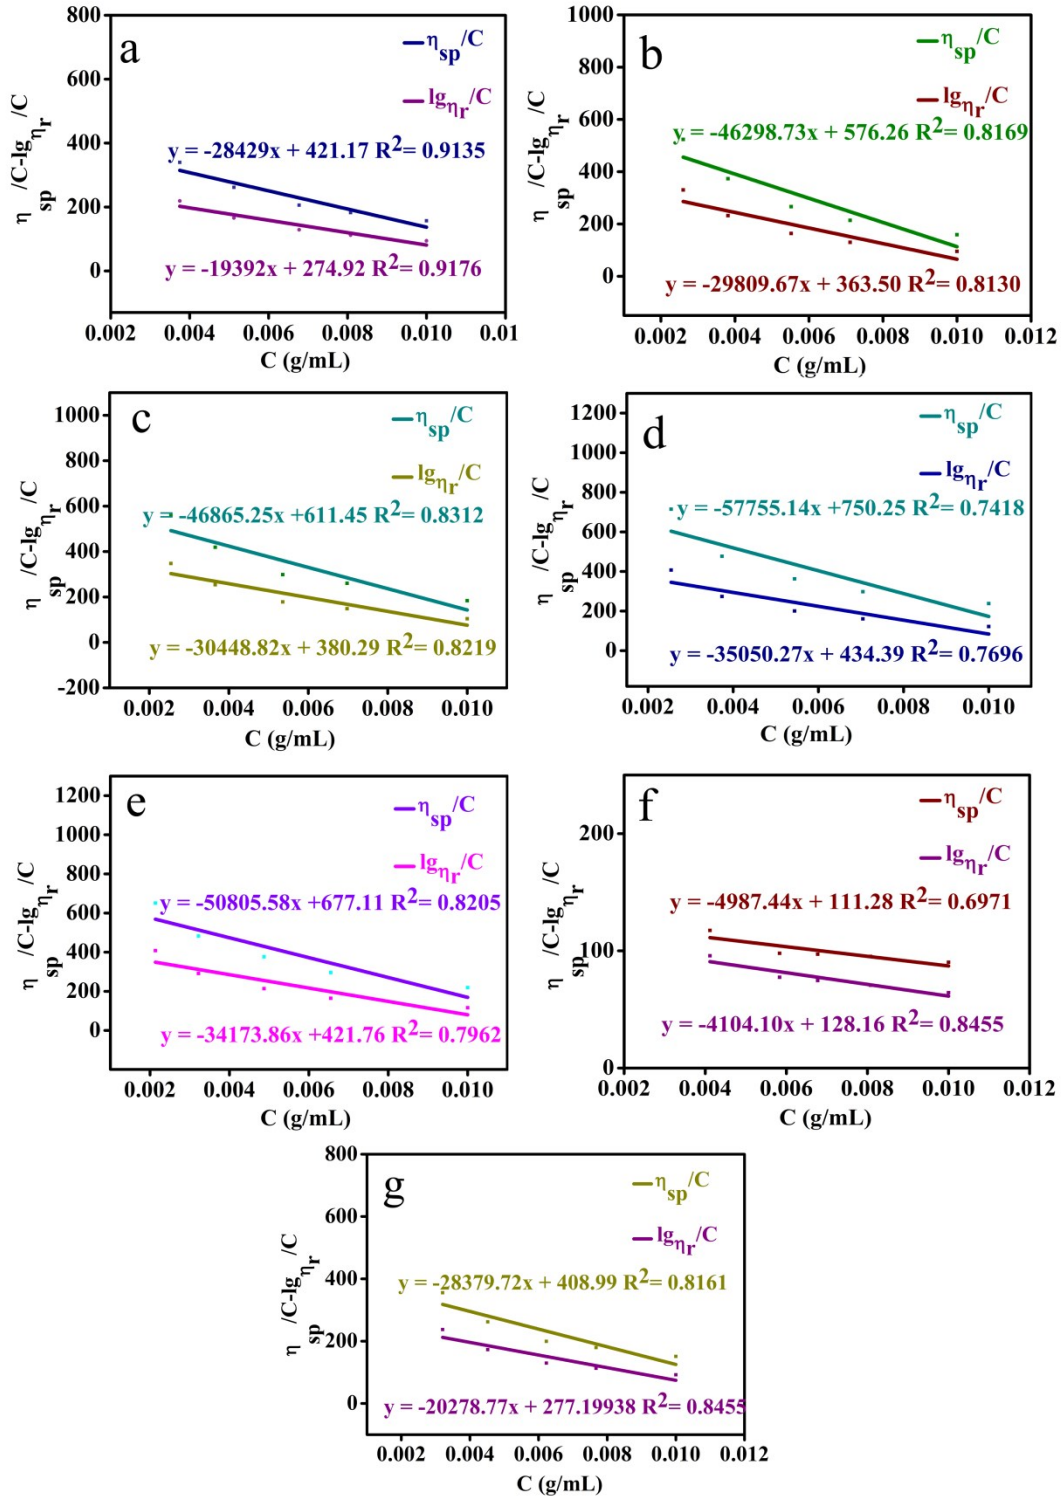

**Figure S3.**  $\frac{\eta_{SP}}{C} - C$  and  $\frac{\ln \eta_r}{C} - C$  curves of PAMs obtained in different MWP firepower and other methods. (a-e) present the fitting curves of PAMs obtained in MWP firepower from P10 to P100; (f, g) present the

---

fitting curves of PAMs in oil bathing and hydrothermal heating method.

---

## **Section S4. Phosphorescence lifetime and decay parameters**

### **Section S4.1 Phosphorescence lifetime and decay parameters of PAMs.**

The time resolved photoluminescence decay curves and delay spectra of PAMs in different MWP power, different precipitation rate, different synthesis method and PAMs treated by different temperature from 80 °C to 130 °C were carried out by tested by the FLS 920 Fluorescence Spectrometer Equipped with microsecond flash-lamp ( $\mu$ F900) and nanosecond hydrogen flashlamp (nF920). The lifetime data ( $\tau$  and corresponding percentage) of PAMs were fitted by the software of FLS 920 Fluorescence Spectrometer. The average lifetime of PAMs were

calculated by  $\tau_0 = \sum \tau_i \times B_i\%$ .



**Table S9.** Phosphorescence lifetime and decay parameters of PAM.

| Polymers                           |      | $\lambda$ | $\tau$<br>(ms)    |                     |                     | $\chi^2$ |
|------------------------------------|------|-----------|-------------------|---------------------|---------------------|----------|
|                                    |      |           | $\tau_1$<br>(ms)  | $\tau_2$<br>(ms)    | $\tau_3$<br>(ms)    |          |
| Different<br>MWP<br>parameters     | P10  | 414       | 109.22<br>(4.08%) | 728.03<br>(16.84%)  | 3352.37<br>(79.08%) | 1.382    |
|                                    |      | 440       | 194.01<br>(6.28%) | 562.66<br>(21.58%)  | 2432.17<br>(72.14%) | 1.486    |
|                                    |      | 462       | 95.30<br>(3.21%)  | 662.68<br>(19.09%)  | 3594.72<br>(77.70%) | 1.219    |
|                                    | P30  | 414       | 16.49<br>(1.64%)  | 493.96<br>(11.41%)  | 3286.38<br>(86.96%) | 1.408    |
|                                    |      | 442       | 60.24<br>(1.51%)  | 752.70<br>(12.91%)  | 3568.00<br>(86.58%) | 1.451    |
|                                    |      | 462       | 47.33<br>(1.38%)  | 478.30<br>(11.41%)  | 3343.53<br>(87.21%) | 1.312    |
|                                    | P50  | 414       | 125.03<br>(3.29%) | 860.91<br>(13.03%)  | 3433.32<br>(83.69%) | 1.319    |
|                                    |      | 442       | 301.17<br>(2.56%) | 527.33<br>(11.17%)  | 3453.73<br>(86.27%) | 1.258    |
|                                    |      | 462       | 16.63<br>(0.73%)  | 457.15<br>(11.28%)  | 3177.53<br>(87.99%) | 1.294    |
|                                    | P80  | 414       | 53.44<br>(0.97%)  | 450.80<br>(6.88%)   | 3408.87<br>(92.14%) | 1.370    |
|                                    |      | 442       | 46.10<br>(0.42%)  | 590.21<br>(7.85%)   | 3270.81<br>(91.74%) | 1.325    |
|                                    |      | 462       | 54.13<br>(1.52%)  | 640.37<br>(11.16%)  | 3686.70<br>(87.32%) | 1.224    |
|                                    | P100 | 414       | 15.57<br>(0.97%)  | 430.94<br>(10.14%)  | 3412.76<br>(88.89%) | 1.305    |
|                                    |      | 440       | 292.25<br>(7.25%) | 2894.83<br>(92.75%) |                     | 1.278    |
|                                    |      | 462       | 23.72<br>(1.19%)  | 422.59<br>(11.24%)  | 3082.93<br>(87.57%) | 1.275    |
| Different<br>precipitation<br>rate | Fast | 414       | 53.44<br>(0.97%)  | 450.80<br>(6.88%)   | 3408.87<br>(92.14%) | 1.370    |
|                                    |      | 442       | 46.10<br>(0.42%)  | 590.21<br>(7.85%)   | 3270.81<br>(91.74%) | 1.325    |
|                                    |      | 462       | 54.13<br>(1.52%)  | 640.37<br>(11.16%)  | 3686.70<br>(87.32%) | 1.224    |
|                                    | Slow | 414       | 42.22<br>(17.23%) | 313.16<br>(62.02%)  | 1334.17<br>(20.75%) | 1.668    |

|                                 |              |     |                    |                    |                     |       |
|---------------------------------|--------------|-----|--------------------|--------------------|---------------------|-------|
|                                 |              | 442 | 78.70<br>(9.64%)   | 547.29<br>(90.36%) |                     | 1.336 |
|                                 |              | 462 | 214.20<br>(31.66%) | 656.91<br>(68.34%) |                     | 1.384 |
| Different synthesis method      | Oil bathing  | 485 | 1.90<br>(7.8%)     | 112.21<br>(50.01%) | 2396.02<br>(49.21%) | 1.169 |
|                                 | Hydrothermal | 483 | 44.95<br>(10.29%)  | 422.56<br>(43.25%) | 2707.71<br>(46.46%) | 1.380 |
| Different temperature treatment | 90           | 417 | 44.91<br>(7.44%)   | 385.03<br>(23.31%) | 3004.24<br>(69.24%) | 1.588 |
|                                 |              | 451 | 30.68<br>(12.91%)  | 270.10<br>(25.41%) | 1658.67<br>(61.68%) | 1.600 |
|                                 |              | 476 | 11.84<br>(3.05%)   | 141.17<br>(24.29%) | 591.89<br>(72.66%)  | 1.336 |
|                                 | 100          | 420 | 149.69<br>(15.17%) | 588.21<br>(84.83%) |                     | 1.492 |
|                                 |              | 444 | 26.44<br>(3.38%)   | 303.74<br>(18.18%) | 542.65<br>(78.44%)  | 1.336 |
|                                 |              | 470 | 106.36<br>(8.09%)  | 493.60<br>(64.13%) | 1509.82<br>(27.78%) | 1.742 |
|                                 | 110          | 453 | 59.30<br>(2.40%)   | 319.73<br>(39.59%) | 723.97<br>(58.01%)  | 1.653 |
|                                 |              | 480 | 80.03<br>(3.22%)   | 422.45<br>(62.33%) | 893.44<br>(34.46%)  | 1.529 |
|                                 | 120          | 458 | 11.84<br>(3.05%)   | 141.17<br>(24.29%) | 591.89<br>(72.66%)  | 1.336 |
|                                 |              | 485 | 44.60<br>(8.51%)   | 297.78<br>(36.83%) | 664.12<br>(54.67%)  | 1.209 |
|                                 | 130          | 483 | 16.78<br>(7.78%)   | 82.64<br>(59.69%)  | 237.59<br>(32.53%)  | 1.336 |

## Section S4.2 Phosphorescence lifetime and decay parameters of Copolymers.

Limited by the life attenuation range of 0~10 s of FLS920 Fluorescence Spectrometer, time resolved photoluminescence decay curves and delay spectra of copolymers in different molar ratios were tested by the FLS 980 Fluorescence Spectrometer Equipped with microsecond flash-lamp ( $\mu$ F900) and nanosecond hydrogen flashlamp (nF980). The obtained time resolved photoluminescence decay curves were multi-exponential fitted (second or third order), the average lifetime of copolymers were obtained originating from the

$$I(t) = I_0 + A_1 \exp(-t/\tau_1) + A_2 \exp(-t/\tau_2) \text{ or } I(t) = I_0 + A_1 \exp(-t/\tau_1) + A_2 \exp(-t/\tau_2) + A_3 \exp(-t/\tau_3)$$

then lifetime data was calculated through the  $\tau = \frac{A_1 t_1^2 + A_2 t_2^2}{A_1 t_1 + A_2 t_2}$  or

$$\tau = \frac{A_1 t_1^2 + A_2 t_2^2 + A_3 t_3^2}{A_1 t_1 + A_2 t_2 + A_3 t_3}$$

**Table S10.** Phosphorescence lifetime and decay parameters of copolymers.

| Copoly mers | $\lambda$ | A         |           |       | $\tau$ (ms)   |               |               | Adj. R-Square |
|-------------|-----------|-----------|-----------|-------|---------------|---------------|---------------|---------------|
|             |           | $A_1$     | $A_2$     | $A_3$ | $\tau_1$ (ms) | $\tau_2$ (ms) | $\tau_3$ (ms) |               |
| 1:12.5      | 414       | 107610.45 | 166099.26 |       | 1090.46       | 4183.99       |               | 0.99998       |
|             | 440       | 173542.92 | 123094.39 |       | 4170.09       | 1084.54       |               | 0.9397        |

|        |     |                      |            |                       |          |                      |                      |         |
|--------|-----|----------------------|------------|-----------------------|----------|----------------------|----------------------|---------|
|        | 462 | 3.35*10 <sup>9</sup> |            |                       | 3379.66  |                      |                      | 0.9974  |
| 1:25   | 414 | 190547.61            | 382035.45  |                       | 1338.28  | 4470.66              |                      | 0.9971  |
|        | 440 | 411461.84            | 833987.72  | 74346.78              | 1422.88  | 4248.11              | 129.15               | 0.9959  |
|        | 462 | 151749.62            | 712020.94  | 513959.77             | 56.04    | 2.57*10 <sup>9</sup> | 4.96*10 <sup>9</sup> | 0.9973  |
| 1:37.5 | 414 | 230550.47            | 79578.22   | 134940.29             | 1562.11  | 539.34               | 4598.18              | 0.9594  |
|        | 440 | 986883.97            | 374746.84  | 496054.99             | 2255.61  | 516.77               | 4972.54              | 0.9882  |
|        | 462 | 1562520.0            | 640569.92  | 1100380.0             | 2269.63  | 490.79               | 4773.68              | 0.9937  |
| 1:50   | 414 | 201178.66            | 297099.33  | 366159.17             | 37.99    | 1387.53              | 4145.29              | 0.9743  |
|        | 442 | 762827.06            | 1105450.0  | 165109.0              | 1487.69  | 3919.72              | 219.93               | 0.9947  |
|        | 462 | 68819.40             | 4165.15    | 55111.30              | 9571.63  | 2250.78              | 44507.5              | 0.9968  |
| 1:62.5 | 414 | 933030.43            | 1890640.0  | 1800050.0             | 316.21   | 1872.13              | 4595.25              | 0.9952  |
|        | 442 | 933030.43            | 1890640.0  | 1800050.0             | 316.21   | 1872.13              | 4595.25              | 0.9947  |
|        | 462 | 1841030.0            | 3320300.0  | 290105.89             | 952.66   | 3632.67              | 7550.64              | 0.9960  |
| 1:75   | 414 | 3.90*10 <sup>9</sup> | 8631250.0  | 4.75*10 <sup>17</sup> | 99009.8  | 34613.9              | 3222.70              | 0.9929  |
|        | 440 | 532971.06            | 1039050.0  | 1910060.0             | 104.43   | 1191.33              | 3630.84              | 0.9923  |
|        | 462 | 173453.07            | 68480800.0 |                       | 583281.0 | 130588.00            |                      | 0.92233 |

---

## Section S5. Relationship of Molecular Weight and Luminescence

To deeply explore the relationship between molecular weight and luminescence performance, initiator that may bring about significant influence on molecular weight was considered as the variables to investigate the effect on luminescence. As the intuitive performance we observed, different amount of initiator indeed bring about the different luminescence emission, therefore the molecular weight of PAMs synthesized in the altered amount of initiator were calculated by the viscosity method with Ubbelohde Viscometer. We controlled the temperature and test conditions as **Section S3** expressed. **Table S11** was the viscosity-average molecular weight value through the calculated formula in **Section S3**. **Table S12-Table S21** displayed the flow time of PAMs synthesized in the changing amount of initiator from 0.2% to 2.0%

and curves in **Figure S4** presented the  $\frac{\eta_{SP}}{C} - C$  and  $\frac{\ln \eta_r}{C} - C$  under the changed conditions of amount of initiator from 0.2% to 2.0%.

**Table S11.** The influence of the amount of Initiator  $(\text{NH}_4)_2\text{S}_2\text{O}_8$  on the  $M_\eta$  of PAMs

---

| Amount of Initiator ((<br>$\text{NH}_4)_2\text{S}_2\text{O}_8$ )<br>(%) | 0.2    | 0.4    | 0.6    | 0.8    | 1.0    | 1.2    | 1.4    | 1.6    | 1.8    | 2.0    |
|-------------------------------------------------------------------------|--------|--------|--------|--------|--------|--------|--------|--------|--------|--------|
| $M_\eta/10^6$                                                           | 1.2410 | 0.8644 | 1.1653 | 1.8832 | 2.5766 | 2.0138 | 0.6189 | 0.5032 | 0.4294 | 0.3969 |

---

**Table S12.** Flow time of PAM obtained at the initiator of 0.2% at different diluted concentration.

| PAM-0.2% initial concentration ( $g/cm^3$ ): 0.01 (123.2 mg/12.32 mL) |        |        |        |           |          | Constant temperature: 30 °C |               |                |
|-----------------------------------------------------------------------|--------|--------|--------|-----------|----------|-----------------------------|---------------|----------------|
| $c/g \cdot cm^{-3}$                                                   | $t_1$  | $t_2$  | $t_3$  | $\bar{t}$ | $\eta_r$ | $\eta_{sp}$                 | $\eta_{sp}/c$ | $\ln \eta_r/c$ |
| 0.01                                                                  | 234.52 | 234.35 | 234.62 | 234.50    | 3.5220   | 2.5220                      | 252.2029      | 125.9037       |
| 0.007113                                                              | 202.17 | 202.91 | 202.84 | 202.64    | 3.0436   | 2.0436                      | 287.29229     | 156.4742       |
| 0.005520                                                              | 184.15 | 184.01 | 184.90 | 184.35    | 2.7689   | 1.7689                      | 320.4695      | 184.51134      |
| 0.003812                                                              | 151.66 | 151.42 | 151.61 | 151.56    | 2.2764   | 1.2764                      | 334.8502      | 215.7988       |
| 0.002604                                                              | 128.23 | 128.90 | 128.12 | 128.42    | 1.9288   | 0.9288                      | 356.7273      | 252.3001       |

**Table S13.** Flow time of PAM obtained at the initiator of 0.4% at different diluted concentration.

| PAM-0.4% initial concentration ( $g/cm^3$ ): 0.01 (141.4 mg/14.14 mL) |        |        |        |           |          | Constant temperature: 30 °C |               |                |
|-----------------------------------------------------------------------|--------|--------|--------|-----------|----------|-----------------------------|---------------|----------------|
| $c/g \cdot cm^{-3}$                                                   | $t_1$  | $t_2$  | $t_3$  | $\bar{t}$ | $\eta_r$ | $\eta_{sp}$                 | $\eta_{sp}/c$ | $\ln \eta_r/c$ |
| 0.01                                                                  | 229.69 | 229.77 | 229.32 | 229.59    | 3.4484   | 2.4484                      | 244.8383      | 123.7905       |
| 0.007388                                                              | 195.72 | 195.26 | 185.71 | 192.23    | 2.8872   | 1.8872                      | 255.4531      | 143.5213       |
| 0.005857                                                              | 170.41 | 170.22 | 170.54 | 170.39    | 2.5592   | 1.5592                      | 266.1848      | 160.4244       |
| 0.004142                                                              | 144.76 | 144.19 | 144.82 | 144.59    | 2.1717   | 1.1717                      | 282.8920      | 187.2383       |
| 0.002877                                                              | 122.22 | 122.41 | 122.53 | 122.39    | 1.8382   | 0.8382                      | 291.2916      | 211.5665       |

**Table S14.** Flow time of PAM obtained at the initiator of 0.6% at different diluted concentration.

| PAM-0.6% initial concentration ( $g/cm^3$ ): 0.01 (142.1 mg/14.21 mL) |        |        |        |           |          | Constant temperature: 30 °C |               |                |
|-----------------------------------------------------------------------|--------|--------|--------|-----------|----------|-----------------------------|---------------|----------------|
| $c/g \cdot cm^{-3}$                                                   | $t_1$  | $t_2$  | $t_3$  | $\bar{t}$ | $\eta_r$ | $\eta_{sp}$                 | $\eta_{sp}/c$ | $\ln \eta_r/c$ |
| 0.01                                                                  | 221.25 | 221.41 | 221.33 | 221.33    | 3.3243   | 2.3243                      | 232.4272      | 120.1251       |
| 0.007397                                                              | 197.07 | 197.34 | 197.90 | 197.44    | 2.9654   | 1.9654                      | 265.6962      | 146.9496       |
| 0.005869                                                              | 177.68 | 177.57 | 177.92 | 177.72    | 2.6693   | 1.6693                      | 284.4070      | 167.2762       |
| 0.004154                                                              | 151.81 | 151.41 | 151.02 | 151.41    | 2.2742   | 1.2742                      | 306.7480      | 197.7991       |
| 0.002888                                                              | 132.71 | 132.70 | 132.43 | 132.61    | 1.9918   | 0.9918                      | 343.4620      | 238.6160       |

**Table S15.** Flow time of PAM obtained at the initiator of 0.8% at

different diluted concentration.

| PAM-0.8% initial concentration ( $g/cm^3$ ) : 0.01 (147.1 mg/14.71 mL) |        |        |        |           |          | Constant temperature: 30 °C |               |                |
|------------------------------------------------------------------------|--------|--------|--------|-----------|----------|-----------------------------|---------------|----------------|
| $c/g \cdot cm^{-3}$                                                    | $t_1$  | $t_2$  | $t_3$  | $\bar{t}$ | $\eta_r$ | $\eta_{sp}$                 | $\eta_{sp}/c$ | $\ln \eta_r/c$ |
| 0.01                                                                   | 253.71 | 253.76 | 253.47 | 253.45    | 3.8066   | 2.8066                      | 280.6649      | 133.6749       |
| 0.007463                                                               | 223.14 | 223.45 | 223.71 | 223.43    | 3.3559   | 2.3559                      | 315.6632      | 162.2235       |
| 0.005953                                                               | 201.89 | 201.71 | 201.33 | 201.64    | 3.0286   | 2.0286                      | 340.7640      | 186.1391       |
| 0.004238                                                               | 177.52 | 177.16 | 177.93 | 177.54    | 2.6665   | 1.6665                      | 393.2344      | 231.4251       |
| 0.002959                                                               | 159.09 | 159.42 | 159.49 | 159.33    | 2.3931   | 1.3931                      | 470.7787      | 294.8787       |

**Table S16.** Flow time of PAM obtained at the initiator of 1.0% at different diluted concentration.

| PAM-1.0% initial concentration ( $g/cm^3$ ) : 0.01 (143.8 mg/14.38 mL) |        |        |        |           |          | Constant temperature: 30 °C |               |                |
|------------------------------------------------------------------------|--------|--------|--------|-----------|----------|-----------------------------|---------------|----------------|
| $c/g \cdot cm^{-3}$                                                    | $t_1$  | $t_2$  | $t_3$  | $\bar{t}$ | $\eta_r$ | $\eta_{sp}$                 | $\eta_{sp}/c$ | $\ln \eta_r/c$ |
| 0.01                                                                   | 297.64 | 297.62 | 297.17 | 297.48    | 4.4680   | 3.4680                      | 346.7958      | 149.6932       |
| 0.007420                                                               | 259.15 | 259.47 | 259.36 | 259.33    | 3.8950   | 2.8950                      | 390.1557      | 183.2454       |
| 0.005898                                                               | 235.84 | 235.14 | 235.66 | 235.55    | 3.5378   | 2.5378                      | 430.2611      | 214.2159       |
| 0.004183                                                               | 199.56 | 199.22 | 199.07 | 199.28    | 2.9931   | 1.9931                      | 476.5243      | 262.1112       |
| 0.002912                                                               | 176.22 | 176.18 | 176.54 | 176.31    | 2.6481   | 1.6481                      | 565.9616      | 334.4168       |

**Table S17.** Flow time of PAM obtained at the initiator of 1.2% at different diluted concentration.

| PAM-1.2% initial concentration ( $g/cm^3$ ) : 0.01 (142.2 mg/14.22 mL) |        |        |        |           |          | Constant temperature: 30 °C |               |                |
|------------------------------------------------------------------------|--------|--------|--------|-----------|----------|-----------------------------|---------------|----------------|
| $c/g \cdot cm^{-3}$                                                    | $t_1$  | $t_2$  | $t_3$  | $\bar{t}$ | $\eta_r$ | $\eta_{sp}$                 | $\eta_{sp}/c$ | $\ln \eta_r/c$ |
| 0.01                                                                   | 261.21 | 261.33 | 261.84 | 261.46    | 3.9270   | 2.9270                      | 292.7005      | 136.7877       |
| 0.007399                                                               | 232.47 | 232.55 | 232.71 | 232.58    | 3.4932   | 2.4932                      | 336.9841      | 169.0624       |
| 0.005871                                                               | 211.22 | 211.54 | 211.6  | 211.45    | 3.1759   | 2.1759                      | 370.6118      | 196.8258       |
| 0.004155                                                               | 184.41 | 174.53 | 174.86 | 177.93    | 2.6725   | 1.6725                      | 402.4759      | 236.5571       |
| 0.002889                                                               | 162.19 | 162.34 | 162.76 | 162.43    | 2.4396   | 1.4396                      | 498.2994      | 308.6956       |

**Table S18.** Flow time of PAM obtained at the initiator of 1.4% at

different diluted concentration.

| PAM-1.4% initial concentration ( $g/cm^3$ ) : 0.01 (148.3 mg/14.83 mL) |        |        |        |           |          | Constant temperature: 30 °C |               |                |
|------------------------------------------------------------------------|--------|--------|--------|-----------|----------|-----------------------------|---------------|----------------|
| $c/g \cdot cm^{-3}$                                                    | $t_1$  | $t_2$  | $t_3$  | $\bar{t}$ | $\eta_r$ | $\eta_{sp}$                 | $\eta_{sp}/c$ | $\ln \eta_r/c$ |
| 0.01                                                                   | 187.81 | 187.23 | 187.19 | 187.41    | 2.8148   | 1.8148                      | 181.4809      | 103.4894       |
| 0.007479                                                               | 160.41 | 160.34 | 160.84 | 160.53    | 2.4111   | 1.4111                      | 188.6838      | 117.6798       |
| 0.005973                                                               | 144.29 | 144.54 | 144.02 | 144.28    | 2.1671   | 1.1671                      | 195.4031      | 129.4868       |
| 0.004258                                                               | 128.33 | 128.13 | 128.67 | 128.38    | 1.9282   | 0.9282                      | 217.9885      | 154.2019       |
| 0.002976                                                               | 112.45 | 112.74 | 112.42 | 112.54    | 1.6902   | 0.6902                      | 231.9287      | 176.3622       |

**Table S19.** Flow time of PAM obtained at the initiator of 1.6% at different diluted concentration.

| PAM-1.6% initial concentration ( $g/cm^3$ ) : 0.01 (149.4 mg/14.94 mL) |        |        |        |           |          | Constant temperature: 30 °C |               |                |
|------------------------------------------------------------------------|--------|--------|--------|-----------|----------|-----------------------------|---------------|----------------|
| $c/g \cdot cm^{-3}$                                                    | $t_1$  | $t_2$  | $t_3$  | $\bar{t}$ | $\eta_r$ | $\eta_{sp}$                 | $\eta_{sp}/c$ | $\ln \eta_r/c$ |
| 0.01                                                                   | 169.71 | 169.67 | 169.02 | 169.47    | 2.5453   | 1.5453                      | 154.5309      | 93.4252        |
| 0.007492                                                               | 147.42 | 147.87 | 147.34 | 147.54    | 2.2160   | 1.2160                      | 162.3002      | 106.2022       |
| 0.005990                                                               | 136.16 | 136.07 | 136.19 | 136.14    | 2.0448   | 1.0448                      | 174.4061      | 119.4048       |
| 0.004276                                                               | 119.59 | 119.95 | 119.87 | 119.80    | 1.7994   | 0.7994                      | 186.9522      | 137.3856       |
| 0.002992                                                               | 106.72 | 106.01 | 106.75 | 106.49    | 1.5995   | 0.5995                      | 200.3882      | 156.9995       |

**Table S20.** Flow time of PAM obtained at the initiator of 1.8% at different diluted concentration.

| PAM-1.8% initial concentration ( $g/cm^3$ ) : 0.01 (140.8 mg/14.08 mL) |        |        |        |           |          | Constant temperature: 30 °C |               |                |
|------------------------------------------------------------------------|--------|--------|--------|-----------|----------|-----------------------------|---------------|----------------|
| $c/g \cdot cm^{-3}$                                                    | $t_1$  | $t_2$  | $t_3$  | $\bar{t}$ | $\eta_r$ | $\eta_{sp}$                 | $\eta_{sp}/c$ | $\ln \eta_r/c$ |
| 0.01                                                                   | 143.16 | 143.02 | 143.22 | 143.13    | 2.1498   | 1.1498                      | 114.9795      | 76.5372        |
| 0.007379                                                               | 126.56 | 126.55 | 126.05 | 126.39    | 1.8983   | 0.8983                      | 121.7255      | 86.8549        |
| 0.005847                                                               | 118.14 | 118.64 | 118.45 | 118.41    | 1.7785   | 0.7785                      | 133.1347      | 98.4662        |
| 0.004131                                                               | 108.35 | 108.27 | 108.67 | 108.43    | 1.6286   | 0.6286                      | 152.1418      | 118.0457       |
| 0.002869                                                               | 101.05 | 101.52 | 101.43 | 101.33    | 1.5220   | 0.5220                      | 181.9511      | 146.4073       |

**Table S21.** Flow time of PAM obtained at the initiator of 2.0% at



---

different diluted concentration.

---

| PAM-2.0% initial concentration ( $g/cm^3$ ) : 0.01 (140.8 mg/14.08 mL) |        |        |        |           |          | Constant temperature: 30 °C |               |                |
|------------------------------------------------------------------------|--------|--------|--------|-----------|----------|-----------------------------|---------------|----------------|
| $c/g \cdot cm^{-3}$                                                    | $t_1$  | $t_2$  | $t_3$  | $\bar{t}$ | $\eta_r$ | $\eta_{sp}$                 | $\eta_{sp}/c$ | $\ln \eta_r/c$ |
| 0.01                                                                   | 156.31 | 156.23 | 156.62 | 156.39    | 2.3489   | 1.3489                      | 134.8854      | 85.3927        |
| 0.007303                                                               | 137.86 | 137.87 | 137.62 | 137.78    | 2.0694   | 1.0694                      | 146.4359      | 99.5845        |
| 0.005752                                                               | 123.37 | 123.94 | 123.86 | 123.72    | 1.8583   | 0.8583                      | 149.2140      | 107.7283       |
| 0.004037                                                               | 109.43 | 109.37 | 109.65 | 109.48    | 1.6444   | 0.6444                      | 159.6216      | 123.2033       |
| 0.002789                                                               | 99.37  | 99.23  | 99.46  | 99.35     | 1.4922   | 0.4922                      | 176.4647      | 143.4971       |

---

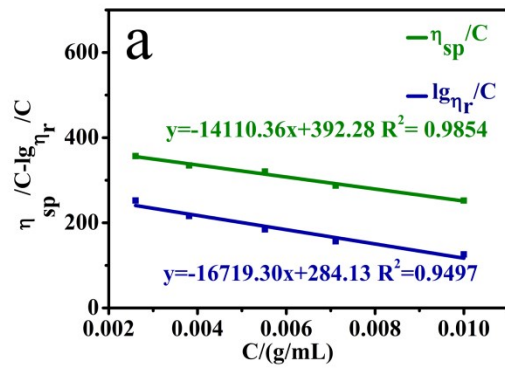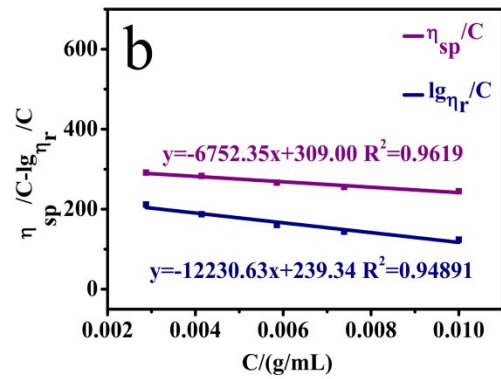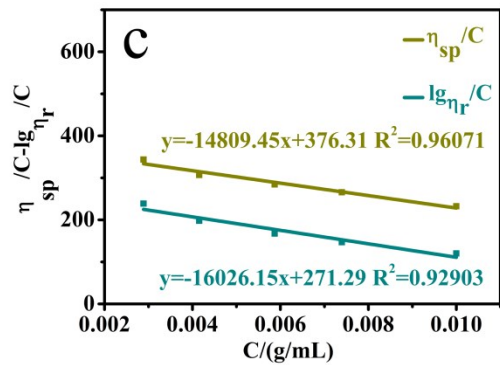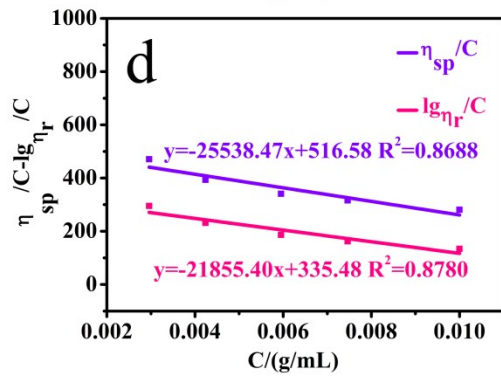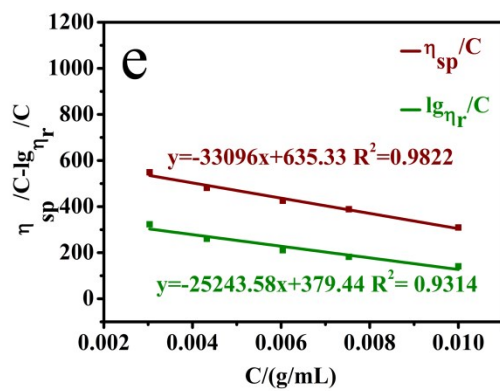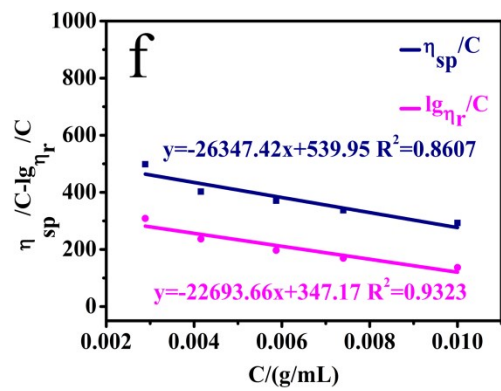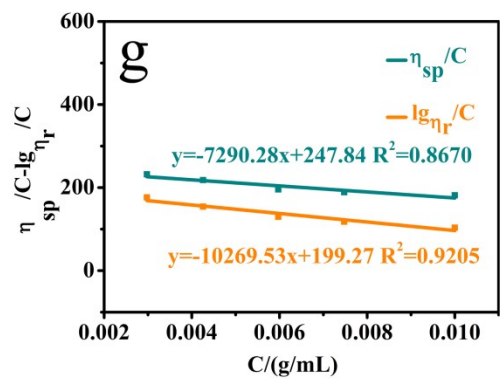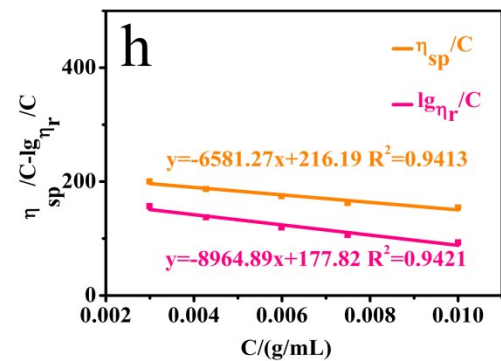

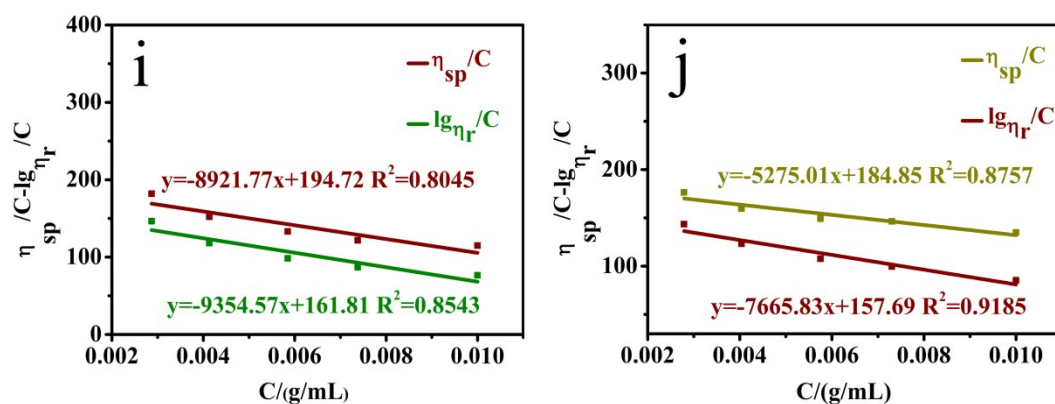

Figure S4.  $\frac{\eta_{SP}}{C} - C$  and  $\frac{\lg \eta_r}{C} - C$  curves of PAMs obtained in different amount of initiator. (a-j) respectively present the curves of PAMs that obtained in different initiator from 0.2% to 2.0%.

---

## Section S6. Transient Decay Curves of PAM in Slow Precipitation

### Rate

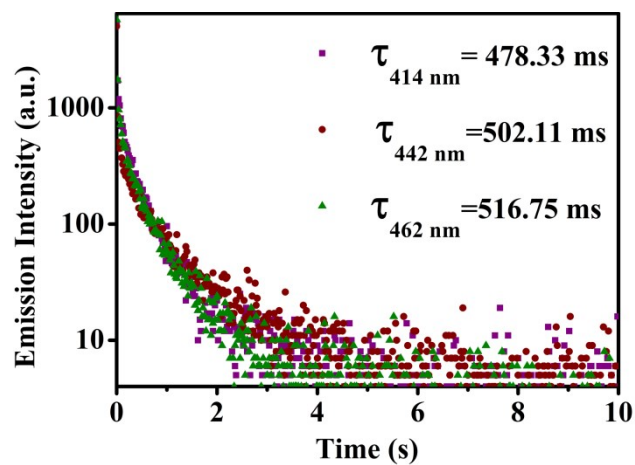

**Figure S5.** Transient luminescence decays of PAMs obtained in slow precipitation rate.

---

## Section S7. Transient Decay Curves of PAM in Other Methods

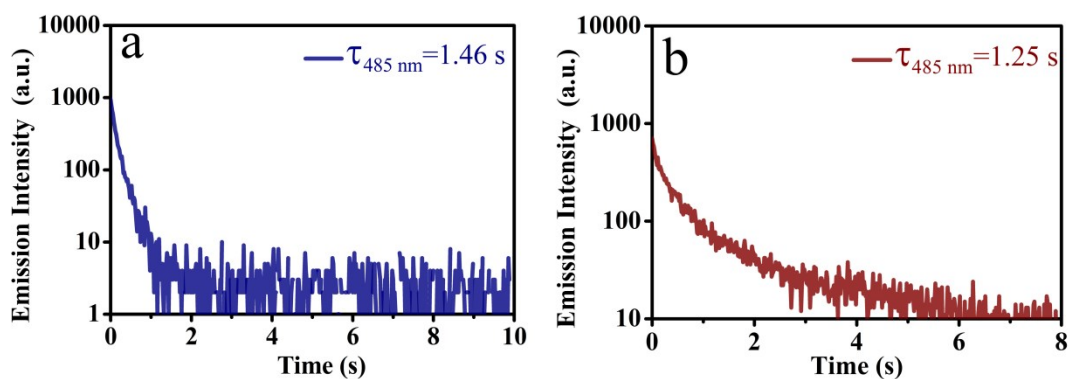

**Figure S6.** Transient luminescence decays of PAMs obtained in different methods. (a, b) Fitting curves of PAM obtained from hydrothermal heating method and oil bathing method whose triplet lifetime respectively were 1.46 s and 1.25 s.

---

## Section S8. Synthetic Method and Structure of PAM and Copolymers

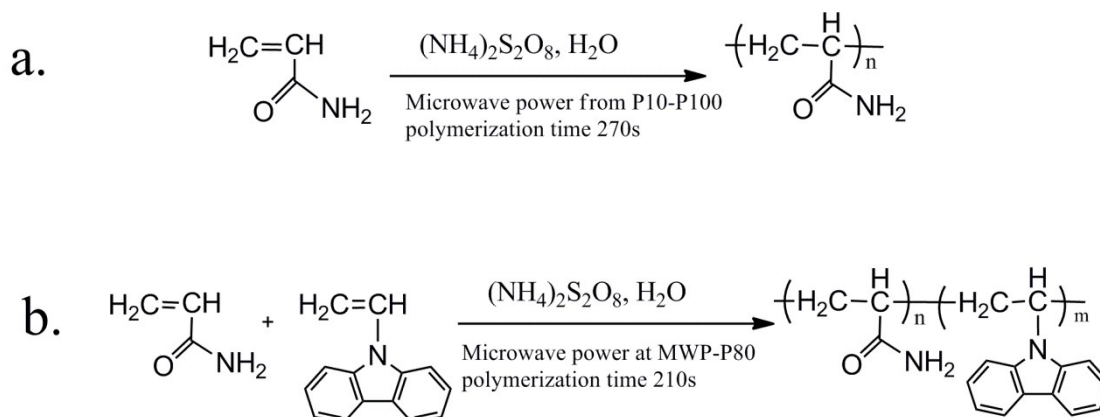

**Figure S7.** Synthetic methods and polymer Structure assisted by MWP of PAM(a) and copolymers(b).

---

**Section S9. Photophysical Properties of Copolymers at Different Molar Ratios**

**Table S22** Photophysical properties of Copolymers at molar ratios from 1:12.5 to 1:75

| Copolymers at different molar ratios | $\lambda_a$ | $\lambda_b$ |             |             | $\Phi_p$<br>(%) |
|--------------------------------------|-------------|-------------|-------------|-------------|-----------------|
|                                      | (nm)        | $\lambda_1$ | $\lambda_2$ | $\lambda_3$ |                 |
| 1:12.5                               | 370         | 414         | 440         | 462         | 27.3            |
| 1:25                                 | 370         | 414         | 440         | 462         | 21.5            |
| 1:37.5                               | 365         | 414         | 440         | 462         | 24.6            |
| 1:50                                 | 375         | 414         | 442         | 462         | 28.0            |
| 1:62.5                               | 376         | 414         | 442         | 462         | 30.7            |
| 1:75                                 | 368         | 414         | 440         | 462         | 27.3            |

---

## Section S10. Schematic Illustration of Copolymer

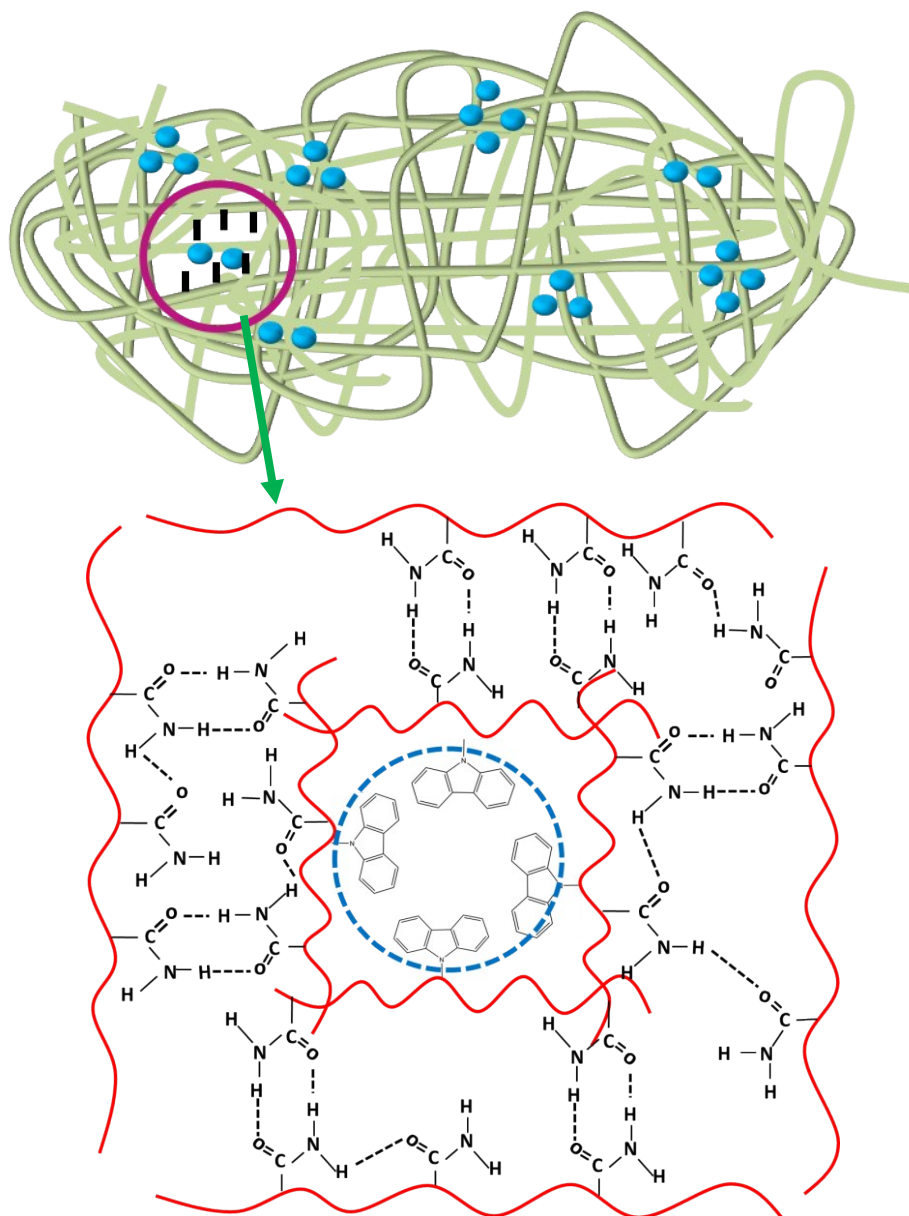

**Figure S8.** Schematic illustration of copolymer and proposed detailed structure of adjacent polymer chains. Amorphous structure of copolymers (vinyl carbazole (blue aggregates)) and detailed structure between adjacent polymer chains were displayed.
